# Supplementary material for: Role of Curing Agents in the Adaptive Response of the Bioprotective Latilactobacillus Curvatus CRL 705 from a Physiologic and Proteomic Perspective
Source: Preprints.org preprint supplement (doi:10.20944/preprints202308.2116.v1), 2023-08-31
Supplement: Supplementary file 1 [file supplementary]

Supplementary Materials

Role of curing agents in the adaptive response of the bioprotective *Latilactobacillus* *curvatus* CRL 705 from a physiologic and proteomic perspective

|  |
| --- |

Lucrecia C. Terán1, Alejandra Orihuel1, Emilse Bentencourt1, E, Raúl Raya1 and Silvina Fadda1,*

1 Centro de Referencia para Lactobacilos, Consejo Nacional de Investigaciones Científicas y Técnicas (CERELA CONICET, CCT Tucumán), Chacabuco 145, T4000ILC Tucumán, Argentina; [lucreteran@gmail.com](mailto:lucreteran@gmail.com) (L.C.T.), a[orihuel@mpdtucuman.gob.ar](mailto:orihuel@mpdtucuman.gob.ar) (A.O.), [ebentencourt@cerela.org.ar](mailto:ebentencourt@cerela.org.ar) (E.B.), [rraya@cerela.org.ar](mailto:rraya@cerela.org.ar) (R.R.)

***** Correspondence: [sfadda@cerela.org.ar](mailto:sfadda@cerela.org.ar) (S.F.)


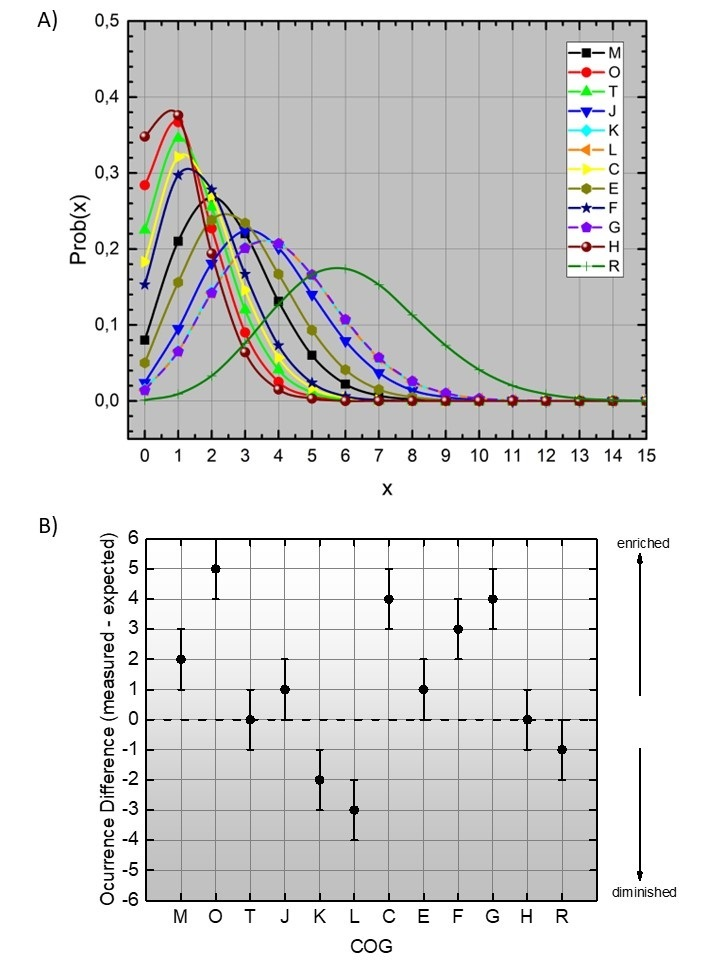


**Figure 1. A)** Hypergeometric distribution for the probabilities (Prob) of finding a certain COG functional category a certain number of times “x” of the differentially expressed proteins of *L. curvatus* CRL 705 while growing in CDM with and without additives at 25 °C. The highest value of the y axis (Prob) for each of the curves represents the higher probability of the times of occurrence of proteins from a certain COG. **B)** Differences between measured and expected occurrence for the proteins of each COG category, where 0 represents no differences in occurrence and separates potentially enriched categories (positive values) from the potentially impoverished categories (negative values).

**Table S2.** Differentially expressed proteins by *L. curvatus* CRL 705 during growth in CDM with (CDM+CA) and without (CDM-) the presence of curing additives (CA) at 25°C

| Biological process | COGa | Spot Nºb | UniProt entry | Name of the protein and abbreviation | MASCOT  Scorec | # matching peptidesd | MM/plf | Fold changeg | Detailed 2DE gel showing differentially expressed  spot in:  CDM+CA | CDM- |
| --- | --- | --- | --- | --- | --- | --- | --- | --- | --- |
| TRANSLATION AND MODIFICATION OF PROTEINS | O | LT04 | A0A3R5V4Y6 | Trigger factor  Tig  WP_004271115.1 | 218 | 7 | 47903/  4.43 | -1.5 | 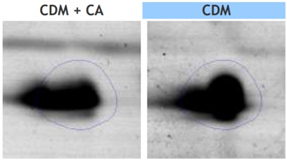 |
| O | LT08 | A0A385ACP8 | ATP-dependent Clp protease ATP-binding subunit  DT351_03000  WP_004265761.1 | 136 | 4 | 81331/  5.06 | -3.0 | 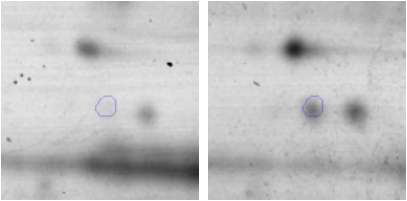 |
| J | LT12 | A0A385ACG4 | Glutamyl-tRNA(Gln) amidotransferase subunit A  GatA  WP_004270872.1 | 408 | 12 | 51771/  4.90 | -1.2 | 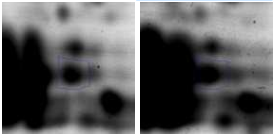 |
| J | LT16 | A0A1B2A539 | 50S ribosomal protein L10  RplJ  WP_064777478.1 | 350 | 8 | 17832/  4.97 | -1.3 | 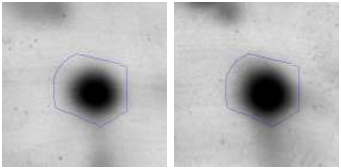 |
| J | LT25 | A0A1X7QIK5 | Elongation factor Tu  TufA  WP_004271118.1 | 112 | 2 | 43183/  4.70 | -1.2 | 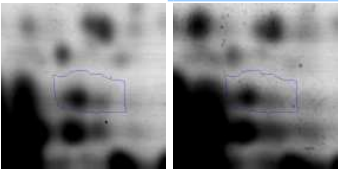 |
| J | LT40 | A0A1B2A552 | 50S ribosomal protein L7/L12  RplL  WP_004270851.1 | 413 | 4 | 12639/ 4.43 | -1.5 | 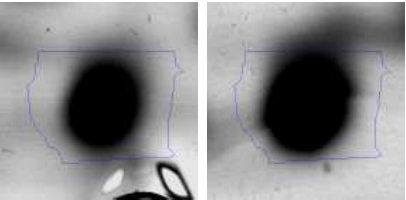 |
| O | LT42 | A0A0B2XPV1 | Molecular chaperone  GroEL  WP_004265033.1 | 324 | 6 | 57243/  4.67 | -1.4 | 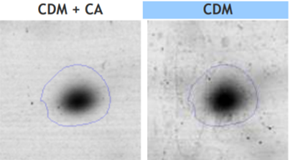 |
|  | G | LT09 | A0A0B2XPK6 | 2,3-diphosphoglycerate-dependent phosphoglycerate mutase  GpmA  WP_039098080.1 | 111 | 2 | 258382/  5.13 | -1.5 | 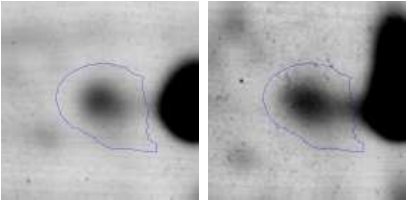 |
| CARBOHYDRATES METABOLISM AND ENERGY PRODUCTION | G | LT10 | UPI000230F3DE | sn-glycerol-3-phosphate ABC transporter ATP-binding protein  UgpC  WP_004266075.1 | 161 | 3 | 40966/  5.36 | +2.3 | 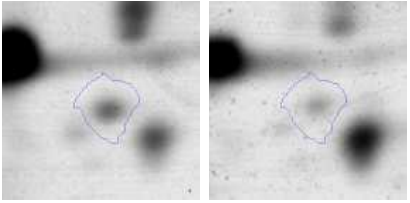 |
| G | LT26 | UPI000230F588 | PTS mannose transporter subunit IIAB  ManX  WP_004270728.1 | 279 | 7 | 35347/  5.34 | -1.3 | 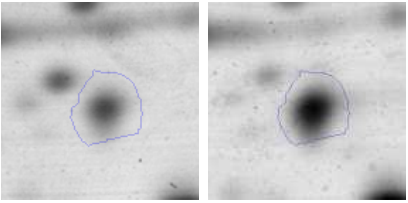 |
| G | LT27 | A0A0B2XK70 | (ATP dependent)  6-phosphofructokinase  PfkA  KHO12221.1 | 234 | 6 | 33664/  5.26 | -1.5 | 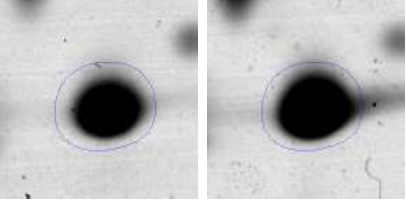 |
| G | LT30 | A0A1B2A4B2 | 2,3-diphosphoglycerate-dependent phosphoglycerate mutase  GpmA  WP_004271006.1 | 345 | 8 | 25868/  5.04 | -1.5 | 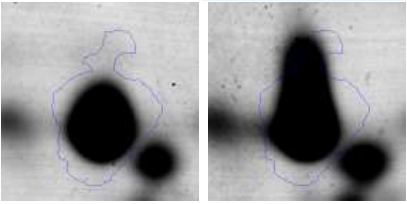 |
| G | LT31 | A0A1B2A408 | Histidine phosphatase  LCU_08255  WP_004266073.1 | 300 | 9 | 24829/  6.08 | -1.8 | 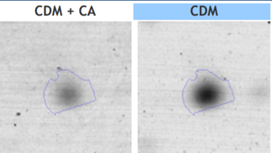 |
| C | LT32 | A0A1B2A5E8 | L-lactate dehydrogenase  Ldh  WP_004270763.1 | 298 | 7 | 33664/  5.26 | -1.4 | 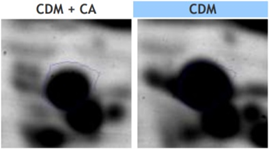 |
| G  T | LT36 | UPI000230EFAA | Pyruvate kinase  Pyk  WP_004270411.1 | 271 | 8 | 62980/ 5.27 | -1.4 | 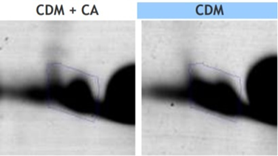 |
| C | LT41 | A0A385ADR5 | L-lactate oxidase  DT351_03565  WP_004265223.1 | 220 | 1 | 39721/  5.36 | +1.7 | 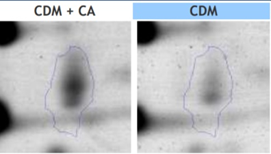 |
| C | LT43 | UPI000B5E1B86 | Dihydrolipoyl dehydrogenase  LpdA  ASN60289.1 | 103 | 1 | 49610  49330/  5.07 | -1.4 | 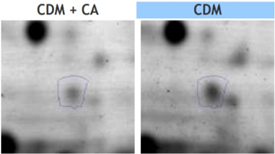 |
| METABOLISM AND TRANSPORT OF AMINOACIDS AND NUCLEOTIDES | F | LT02 | A0A4U0E4L1 | Dihydroorotase  FCF11_02690  WP_004270425.1 | 226 | 8 | 46224/  5.45 | -2.8 | 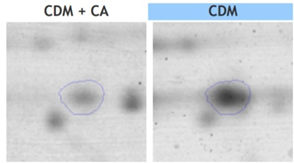 |
| F | LT07 | A0A4U0E0K0 | CTP sintetase  FCF11_05720  WP_004270634.1 | 314 | 7 | 58991/  5.44 | -2.7 | 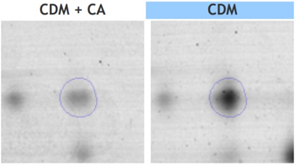 |
| E | LT11 | UPI000230F388 | Type I glutamate--ammonia ligase  GlnA  WP_004265314.1 | 382 | 9 | 50544/  5.40 | -2.3 | 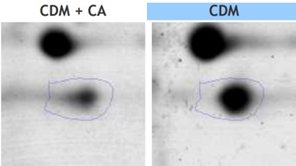 |
| E  H | LT19 | UPI0006F0BB97 | Pyruvate oxidase  Pox  KRK92661.1 | 240 | 9 | 61527/ 5.06 | +1.6 | 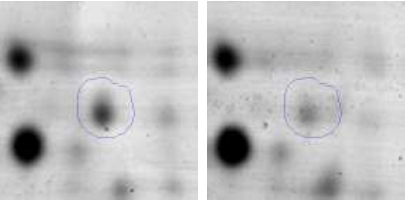 |
| F  R | LT28 | A0A1B2A4E0 | IMP dehydrogenase  GuaB  WP_004265151.1 | 355 | 9 | 52368/  5.37 | -1.5 | 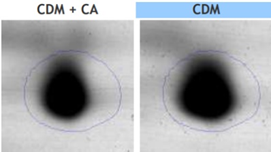 |
| E | LT35 | UPI000230EFAA | ABC transporter family protein  OppF  WP_004265559.1 | 363 | 9 | 36057/  6.09 | -1.8 | 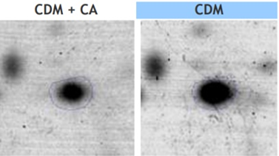 |
| F | LT37 | A0A1X7QJJ2 | UMP kinase  PyrH  WP_076800600.1 | 245 | 5 | 25824/  5.04 | -1.5 | 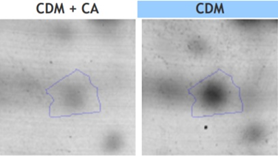 |
| CELL WALL BIOSYNTHESIS | M | LT14 | WP_056967123.1 | bifunctional UDP-N-acetylglucosamine diphosphorylase/glucosamine-1-phosphate N-acetyltransferase, partial  GlmU | 240 | 7 | 43975/  5.73 | -1.4 | 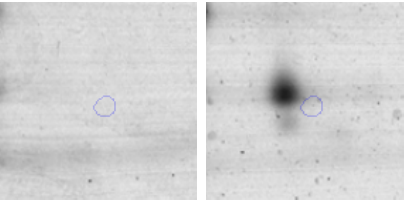 |
| M | LT22 | UPI000B5EB748 | D-alanine--D-alanine ligase  Ddl  ASN59162.1  WP_004271284.1 | 281 | 6 | 38239/ 4.48 | -1.5 | 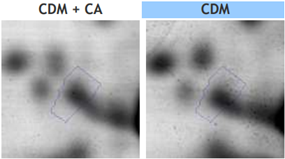 |
| M | LT23 | UPI000230D57D | UTP--glucose-1-phosphate uridylyltransferase  GalU  WP_004271214.1 | 188 | 7 | 33693/ 5.52 | -1.7 | 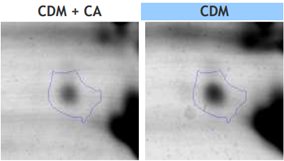 |
| M | LT39 | UPI000975D304 | dTDP-4-dehydrorhamnose 3,5-epimerase  RfbC  WP_076638998.1 | 431 | 9 | 21646/  5.35 | -1.4 | 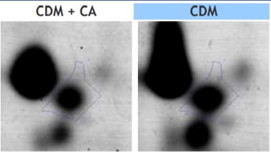 |
| RNA RELATED | R | LT13 | A0A221RYJ7 | GTPase Era  Era  WP_004270810.1 | 165 | 5 | 34532/ 6.04 | -1.7 | 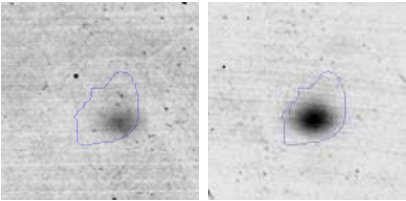 |
| R | LT18 | A0A1B2A7I2 | Ribonuclease J  Rnj  WP_065825720.1 | 239 | 8 | 63559/  5.70 | -1.6 | 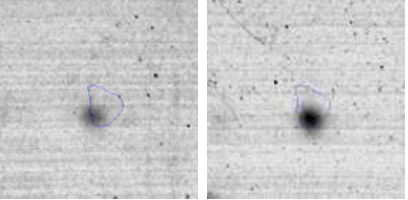 |
| R | LT38 | UPI000230F4ED | Phenylalanine-tRNA ligase/  DUF4479 domain-containing protein  PheRS  WP_004270340.1 | 145 | 1 | 22224/ 4.34 | -1.3 | 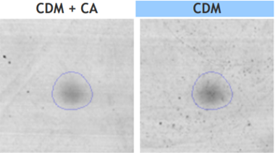 |
| DNA REPLICATION AND REPAIR | L | LT05 | A0A0B2XPH3 | Single-stranded DNA-binding protein  Ssb  WP_004265848.1 | 367 | 6 | 18621/ 4.92 | -1.4 | 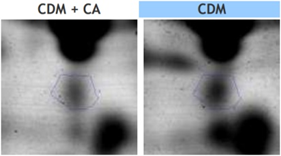 |
| L | LT20 | UPI000230F194 | putative endonuclease 4  Nfo  EHE85189.1 | 107 | 6 | 32046/  5.28 | -1.5 | 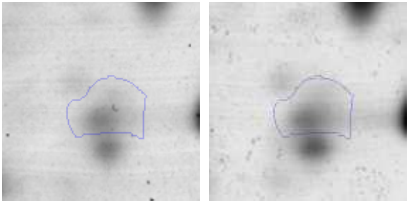 |
| REDOX PROCESSES | O | LT06 | A0A1B2A4R3 | NAD(P)/FAD-dependentOxidoreductase  BCY75_02680  WP_004270517.1 | 173 | 3 | 36259  36281/  5.21 | -1.4 | 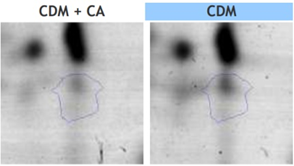 |
| O  C | LT15 | A0A0B2XKA6 | Thioredoxin  TrxA  WP_004265032.1 | 140 | 9 | 11555/  4.57 | -1.6 | 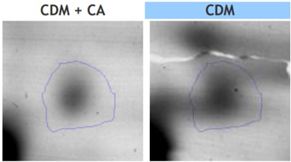 |
| REDOX PROCESSES | O | LT21 | A0A385AFF0 | Thioredoxin-disulfide reductase  TrxB  WP_004265965.1 | 118 | 3 | 32787/  4.73 | -1.3 | 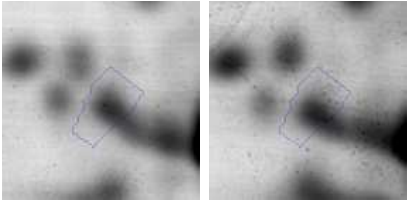 |
| C  R | LT29 | A0A0B2XMI6 | NADP-dependent oxidoreductase  OA78_1420  WP_035185948.1 | 421 | 9 | 33766/ 5.13 | -1.3 | 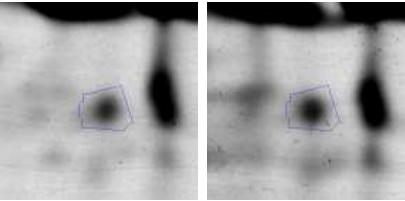 |
| REGULATION | K | LT03 | A0A0B2XPU8 | Cold Shock protein  **CspC**  WP_004270163.1 | 178 | 3 | 7346/ 4.48 | -1.4 | 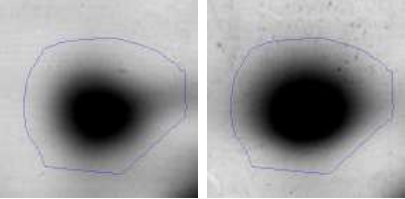 |
| K | LT17 | A0A0B2XP73 | MarR family transcriptional regulator  OhrR  WP_039098448.1 | 173 | 6 | 17636/ 5.97 | -2.0 | 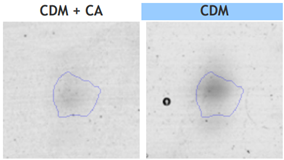 |

a: Functional category according to COG database where each letter represents the different COG functional categories: O: molecular chaperones and related functions; J: translation, including ribosome structure and biogenesis; G: carbohydrate metabolism and transport; C: energy production and conversion; T: signal transduction mechanisms; K: transcription; E: amino acid transport and metabolism; F: nucleotide transport and metabolism; H: Coenzyme transport and metabolism; M: cell wall structure and biogenesis and outer membrane; L: Replication, recombination and repair; K: Transcription; R: general functional prediction only.

b: Spot designations correspond to those of the gels shown in Figure 3
